# Supplementary material for: Using a deep neural network to detect methane point sources and quantify emissions from PRISMA hyperspectral satellite images
Source: Copernicus journal article supplement (doi:10.5194/egusphere-2022-924), 2022-11-02
Supplement: Supplementary file 1 [file egusphere-2022-924-supplement.pdf]

# Supplemental material for “Using a deep neural network to detect methane point sources and quantify emissions from PRISMA hyperspectral satellite images”

Peter Joyce<sup>1,2,3</sup>, Cristina Ruiz Villena<sup>4,5</sup>, Yahui Huang<sup>2,3</sup>, Alex Webb<sup>4,5</sup>, Manuel Gloor<sup>1</sup>, Fabien H. Wagner<sup>6,7</sup>, Martyn P. Chipperfield<sup>2,3</sup>, Rocío Barrio Guilló<sup>4</sup>, Chris Wilson<sup>2,3</sup>, and Hartmut Boesch<sup>4,5</sup>

<sup>1</sup>*School of Geography, University of Leeds, Leeds, United Kingdom*

<sup>2</sup>*National Centre for Earth Observation, University of Leeds, Leeds, United Kingdom*

<sup>3</sup>*School of Earth and Environment, University of Leeds, Leeds, United Kingdom*

<sup>4</sup>*University of Leicester, Leicester, United Kingdom*

<sup>5</sup>*National Centre for Earth Observation, University of Leicester, Leicester, United Kingdom*

<sup>6</sup>*Institute of Environment and Sustainability, University of California, Los Angeles, CA, USA*

<sup>7</sup>*Jet Propulsion Laboratory, California Institute of Technology, 4800 Oak Grove, Pasadena, CA 91109, USA*

This file contains the following:

**Figure S1-** Wind speed of the training and validation images used in this paper. Colour scale indicates number of images with each wind speed.

**Figure S2-** Mix depth of the training and validation images used in this paper. Colour scale indicates number of images with each mix depth.

**Figure S3-** Plume time step (s) of the training and validation images used in this paper. Colour scale indicates number of images with each time step.

**Figure S4-** Emission rate of the training and validation images used in this paper. Colour scale indicates number of images with each emission rate.

**Table S1-** Locations of PRISMA scenes used to make training, validation, and testing data.

**Table S2-** Mean and standard deviation of the noise and methane concentrations of the false positives and false negatives described in Table 1.

**Table S3-** Plumes found in the Korpeje oil field using the neural network.

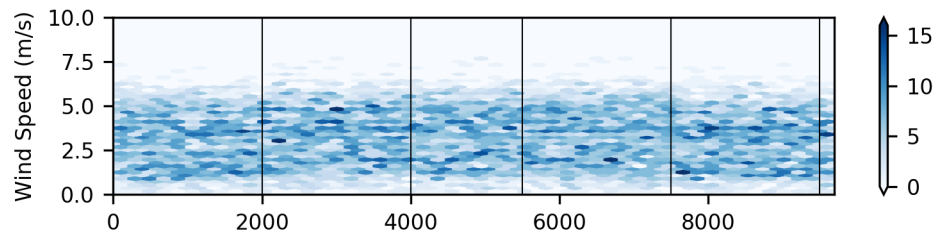

**Figure S1: Wind speed of the training and validation images used in this paper. Colour scale indicates number of images with each wind speed.**

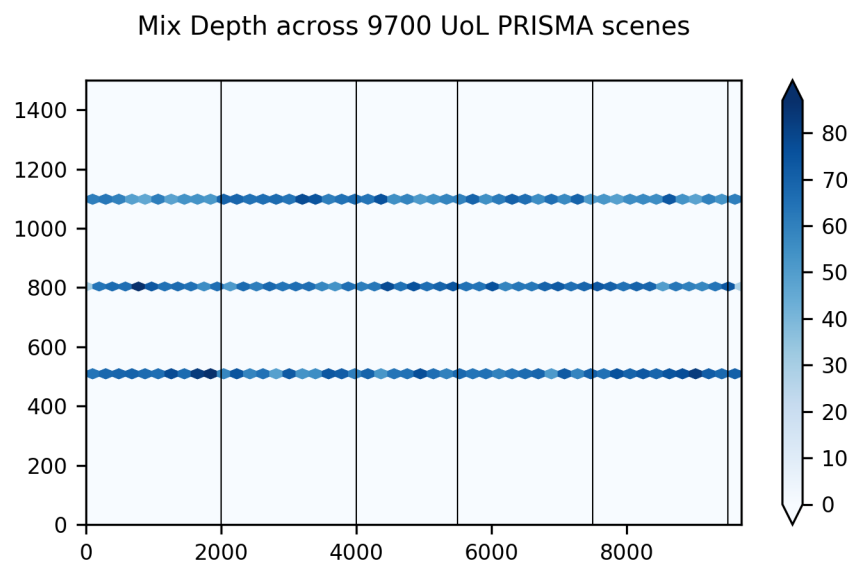

**Figure S2:** Mix depth of the training and validation images used in this paper. Colour scale indicates number of images with each mix depth.

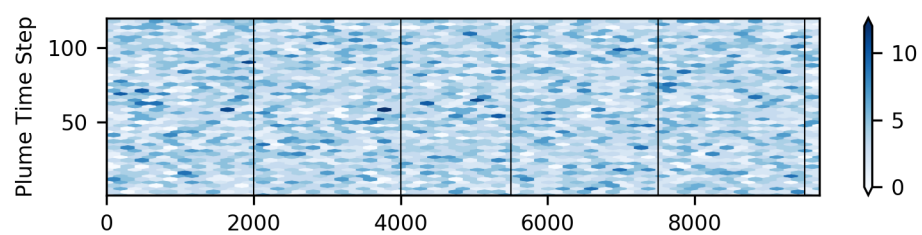

**Figure S3: Plume time step (s) of the training and validation images used in this paper. Colour scale indicates number of images with each time step.**

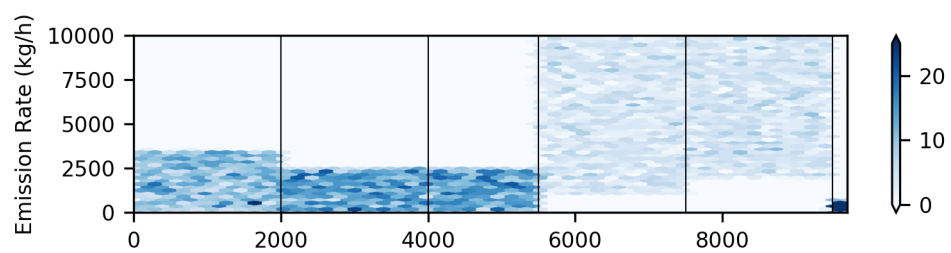

**Figure S4:** Emission rate of the training and validation images used in this paper. Colour scale indicates number of images with each emission rate.

**Table S1: Locations of PRISMA scenes used to make training, validation, and testing data. Right column lists of numbers detail the number of different training images made using the corresponding scene in the left column. Each value in the list corresponds to a different PRISMA scene.**

| <b>Scene location</b> | <b>Number of images made</b>                               |
|-----------------------|------------------------------------------------------------|
| Brazil                | 412, 437                                                   |
| Canada                | 442, 437                                                   |
| Iraq                  | 151, 161, 159, 154, 149, 16                                |
| Iran                  | 169, 14, 15, 12, 21, 15, 18, 15                            |
| Saudi Arabia          | 18, 16, 21, 12, 7                                          |
| South Africa          | 434, 407, 418, 421, 449, 438                               |
| Texas                 | 147, 157, 143, 183, 170, 428, 417                          |
| Turkmenistan          | 152, 167, 145, 168, 153, 162, 140, 155, 147, 431, 390, 450 |

**Table S2. Mean and standard deviation of the noise and methane concentrations of the false positives and false negatives described in Table 1.**

|                       | <b>Mean, std of scene noise (PSNR)</b> | <b>Mean, std of max methane concentration (1e18 molecules cm<sup>-2</sup>)</b> |
|-----------------------|----------------------------------------|--------------------------------------------------------------------------------|
| <b>True positive</b>  | 20,5                                   | 49,                                                                            |
| <b>True negative</b>  | 18,5                                   | N/A                                                                            |
| <b>False positive</b> | 20, 5                                  | N/A                                                                            |
| <b>False negative</b> | 17, 5                                  | 10, 9                                                                          |

**Table S3. Plumes found in the Korpeje oil field using the neural network. PRISMA scene code indicated on the far left, with 'PRS\_L1\_STD\_OFFL\_' from the beginning for brevity. Coordinates of the centre of the plume and estimated emission rate are detailed in the right-most columns.**

| Scene code                         | Plume number | Coords of plume (x,y) | Emission rate (kg/hr) |
|------------------------------------|--------------|-----------------------|-----------------------|
| 20210209072220_20210209072224_0001 | 1            | 314, 420              | 1112                  |
| 20210310072149_20210310072153_0001 | 2            | 323, 405              | 1281                  |
| 20210414072435_20210414072439_0001 | 3            | 307, 422              | 1134                  |
| 20210622071436_20210622071440_0001 | 4            | 420, 300              | 6249                  |
| 20210721071449_20210721071453_0001 | 5            | 309, 427              | 3008                  |
| 20210808072451_20210808072455_0001 | 6            | 537, 456              | 2726                  |
| 20200419072133_20200419072138_0001 | 7            | 916, 84               | 2098                  |
|                                    | 8            | 301, 409              | 2906                  |
| 20200703071439_20200703071443_0001 | 9            | 299, 381              | 4841                  |
|                                    | 10           | 548, 410              | 1539                  |
|                                    | 11           | 548, 456              | 1885                  |
| 20200721072426_20200721072430_0001 | 12           | 320, 411              | 7615                  |
|                                    | 13           | 489, 432              | 2370                  |
| 20200807071742_20200807071747_0001 | 14           | 335, 450              | 5204                  |
| 20201010072033_20201010072038_0001 | 15           | 329, 407              | 1769                  |
| 20201114072336_20201114072341_0001 | 16           | 469, 362              | 2332                  |
| 20220327071152_20220327071156_0001 | 17           | 431, 351              | 3038                  |
|                                    | 18           | 480, 569              | 3591                  |
|                                    | 19           | 480, 584              | 5263                  |
| 20220524071139_20220524071144_0001 | 20           | 411, 282              | 2465                  |
| 20211219071850_20211219071854_0001 | 21           | 268, 704              | 5304                  |
